# Supplementary material
Source: PubMed Central journal article supplement (PMC2901418)
Supplement: NIHMS204238-supplement-1.pdf [file NIHMS204238-supplement-1.pdf]

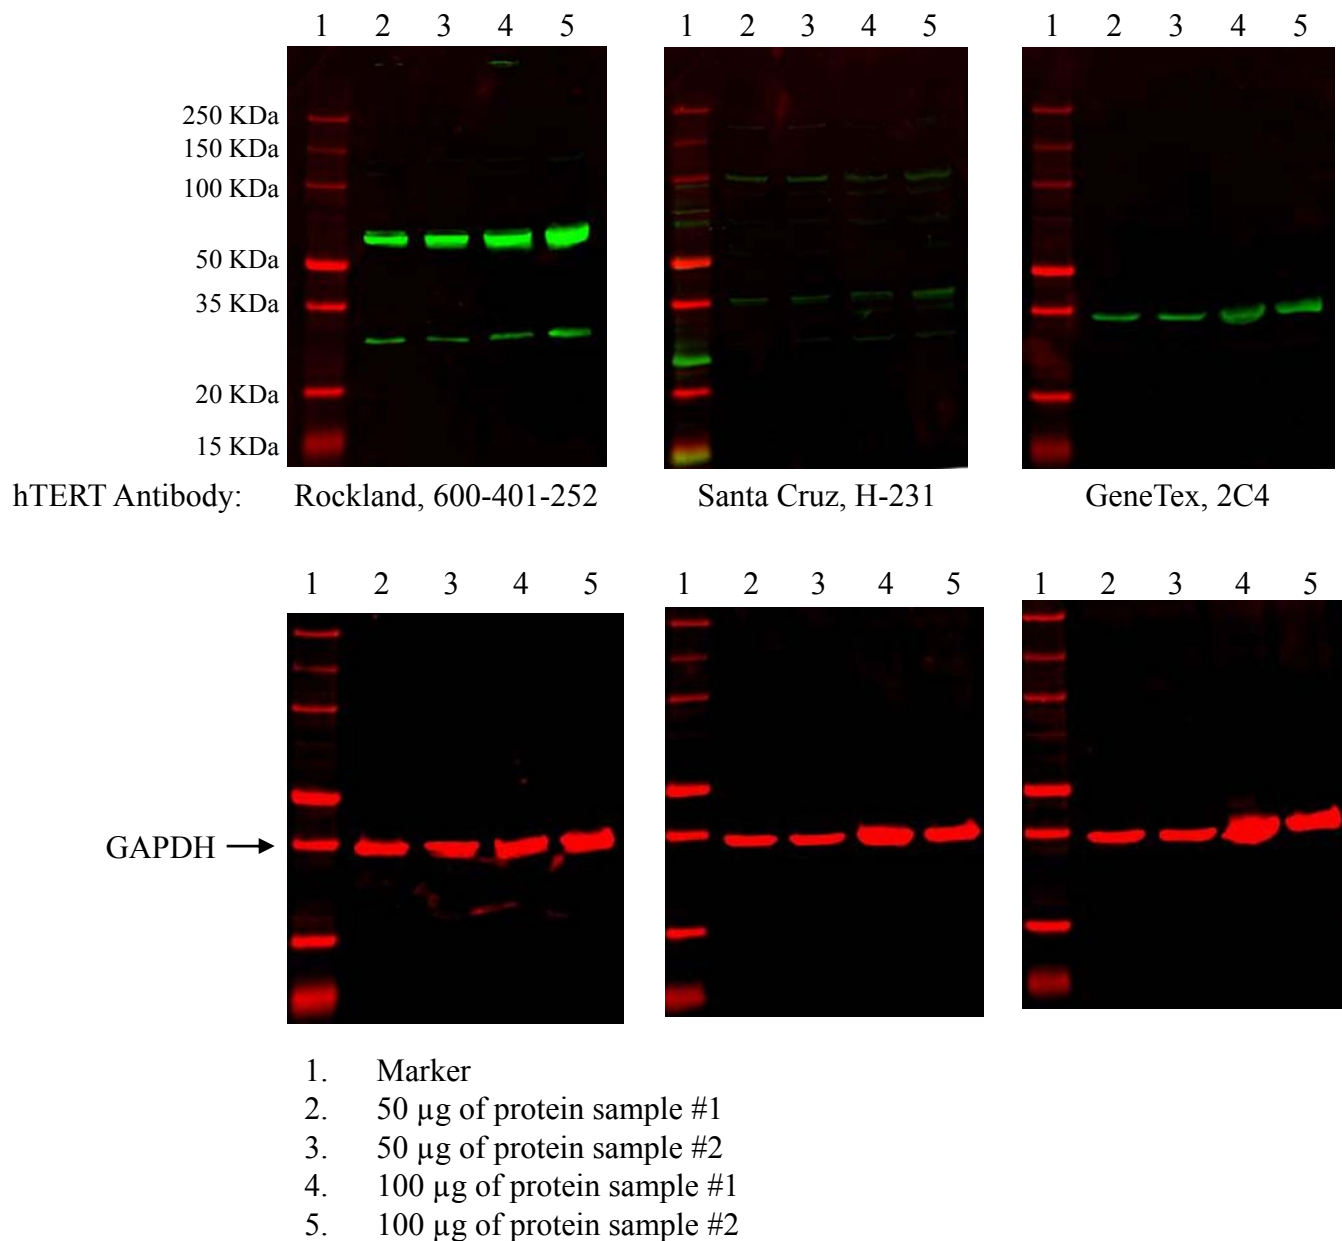

**Figure S1. Western analysis of hTERT protein in LNCaP cells.** Top panels represent Western analysis of two preparations of LNCaP cell lysate, at the amount of 50 or 100 µg of total protein, with an hTERT antibody from Rockland Immunochemicals for Research (Cat# 600-401-252), Santa Cruz Biotechnology (Cat# sc-7212), or GeneTex (Cat# GTX30410). The signals were detected with the use of a fluorescently-labeled secondary antibody conjugated with a green dye (LI-COR Biosciences). Bottom panels are GAPDH Western analysis of the blots presented in the top panels as a loading control, and the secondary antibody used was red-dye conjugated. The sizes of the marker bands are indicated.
